# Supplementary material
Source: PubMed Central journal article supplement (PMC8712368)
Supplement: NIHMS1739296-supplement-Supplemental_Publication_Material.pdf [file NIHMS1739296-supplement-Supplemental_Publication_Material.pdf]

## SUPPLEMENTAL MATERIAL

**Supplemental Table I.** Flow chart for analytic sample.

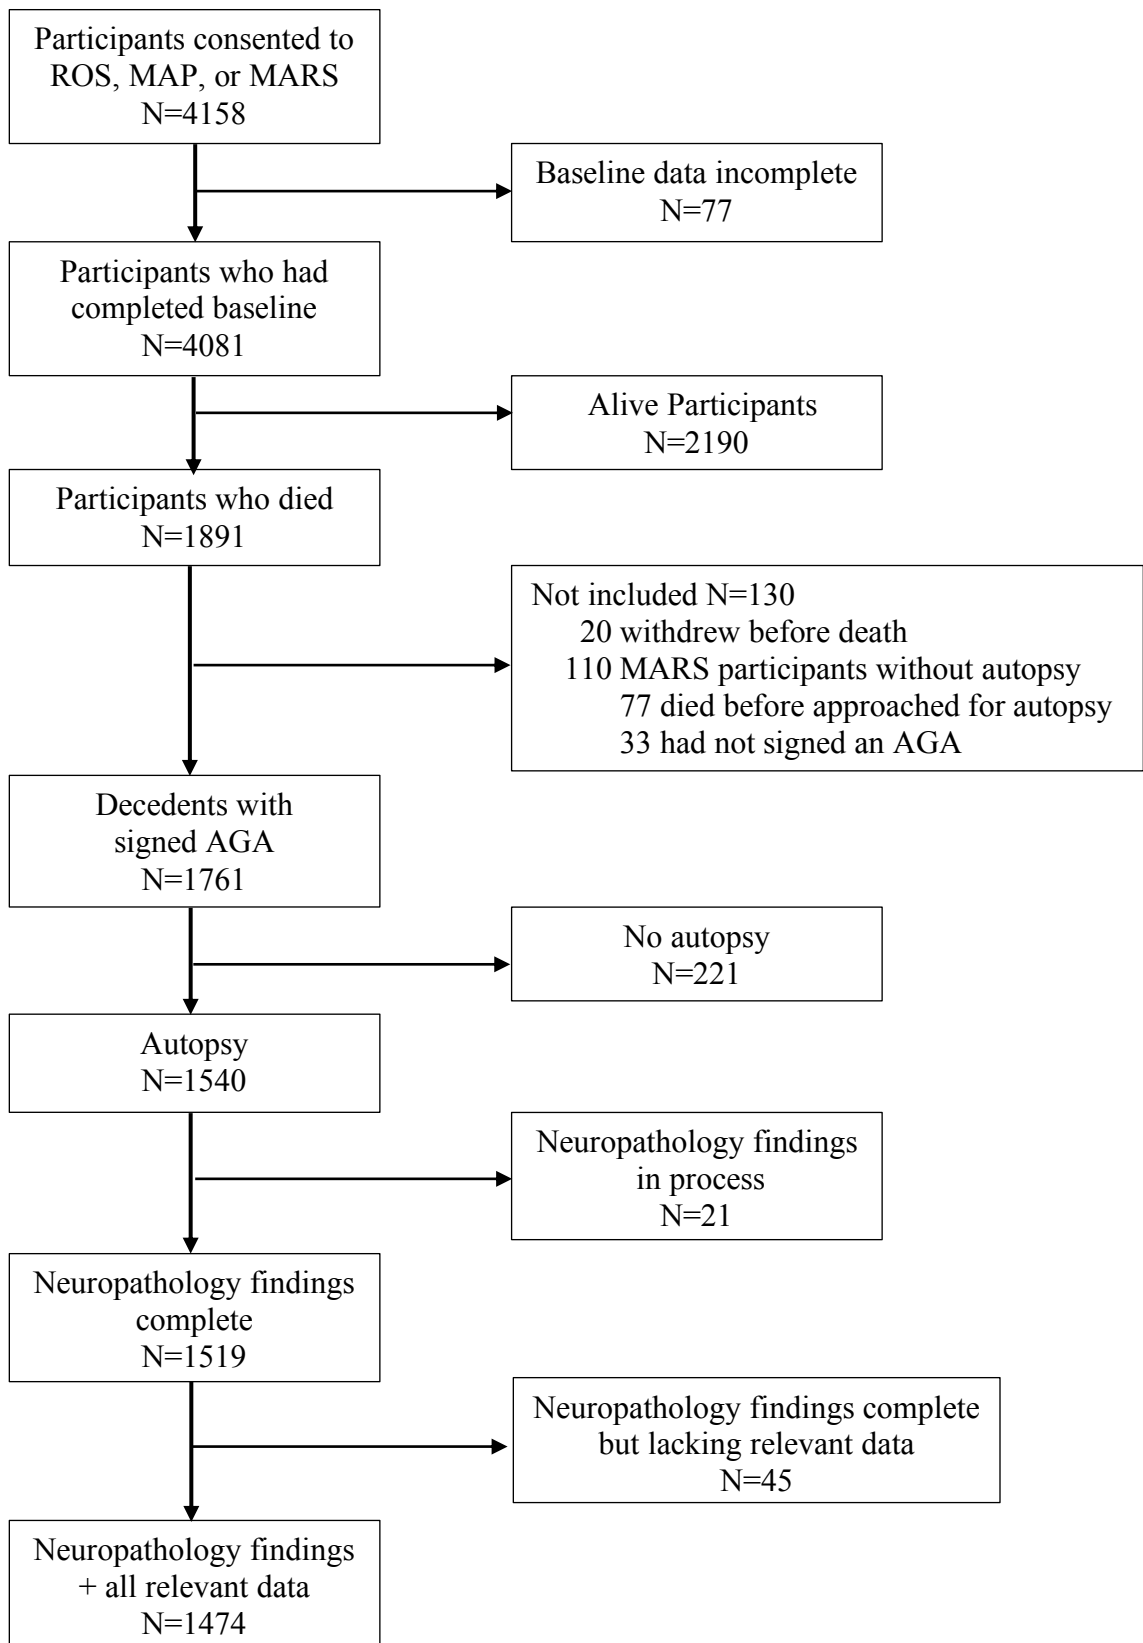

**Supplemental Table II.** Characteristics of single versus mixed CVD neuropathology groups

|                                                                    | <b>Single CVD Pathology</b><br>(n=442) | <b>Mixed CVD Pathology</b><br>(N=742) | <b>Reference Group</b><br>(n=290) |
|--------------------------------------------------------------------|----------------------------------------|---------------------------------------|-----------------------------------|
| <b>Demographics</b>                                                |                                        |                                       |                                   |
| Age at death (years) <sup>^^</sup>                                 | 88.2±6.9**                             | 90.2±6.3***                           | 86.9±6.9                          |
| Sex (% female)                                                     | 65.3%                                  | 67.6%                                 | 69.3%                             |
| Education (years)                                                  | 16.3±3.7                               | 16.0±3.5*                             | 16.5±3.5                          |
| Race (% white)                                                     | 95.7%                                  | 95.9%**                               | 92.7%                             |
| <b>CVD-Related Neuropathology</b>                                  |                                        |                                       |                                   |
| Arteriosclerosis (mod to severe, %)                                | 15.6%                                  | 50.3%                                 | 0%                                |
| Atherosclerosis (mod to severe, %)                                 | 16.9%                                  | 55.8%                                 | 0%                                |
| CAA (mod to severe, %)                                             | 33.4%                                  | 50.5%                                 | 0%                                |
| Macroinfarcts (one or more, %)                                     | 18.7%                                  | 60.1%                                 | 0%                                |
| Microinfarcts (one or more, %)                                     | 15.1%                                  | 49.4%                                 | 0%                                |
| <b>AD-Related and Other Neuropathology</b>                         |                                        |                                       |                                   |
| NIA-Reagan Diagnosis of AD (high or intermediate, %) <sup>^^</sup> | 59.7%                                  | 70.7%**                               | 57.2%                             |
| Hippocampal Sclerosis (present with CA1 region affected, %)        | 8.1%                                   | 9.2%                                  | 5.2%                              |
| TDP-43 (neocortical, %)                                            | 13.9%                                  | 15.1%                                 | 8.8%                              |
| Lewy Bodies (neocortical, %)                                       | 13.1%                                  | 10.5%*                                | 15.8%                             |
| <b>Cognitive Scores</b>                                            |                                        |                                       |                                   |
| Global Cognition <sup>^^</sup>                                     | -0.05±0.6                              | -0.23±0.7***                          | 0.04±0.6                          |
| Episodic Memory <sup>^^</sup>                                      | -0.08±0.8                              | -0.29±0.8***                          | 0.02±0.7                          |
| Semantic Memory <sup>^^</sup>                                      | -0.06±0.8                              | -0.25±0.9***                          | -0.01±0.9                         |
| Working Memory <sup>^^</sup>                                       | -0.04±0.8                              | 0.11±0.8**                            | 0.08±0.8                          |
| Visuospatial Ability                                               | -0.02±0.8                              | 0.02±0.8*                             | 0.10±0.7                          |
| Perceptual speed <sup>^^</sup>                                     | -0.09±0.8                              | -0.31±0.9***                          | 0.007±0.9                         |

all values equal mean±standard deviation unless otherwise noted; CVD=cerebrovascular disease; %=percent; CAA=cerebral amyloid angiopathy. <sup>^</sup>p<0.05, <sup>^^</sup>p≤0.01, <sup>^^^</sup>p<0.0001 for comparisons between single and mixed CVD pathology groups; \*p<0.05, \*\*p≤0.01, \*\*\*p<0.0001 for comparisons between either the single or the mixed CVD pathology group (separately) and the reference group; comparisons involving AD-Related and Other Neuropathology were adjusted for age at death.

**Supplemental Table III.** Associations between single and mixed CVD neuropathology groups (in the same model) and decline in domain-specific cognitive functioning

|                                                        | <b>Cognitive Composite Score Outcomes</b><br>unstandardized beta coefficient of interaction of stated group/pathology with time<br>(95% confidence intervals) |                                         |                                          |                                         |                                         |
|--------------------------------------------------------|---------------------------------------------------------------------------------------------------------------------------------------------------------------|-----------------------------------------|------------------------------------------|-----------------------------------------|-----------------------------------------|
|                                                        | Episodic Memory                                                                                                                                               | Semantic Memory                         | Working Memory                           | Visuospatial Ability                    | Perceptual speed                        |
| all SINGLE CVD profiles                                | 0.003<br>(0.003, 0.002)                                                                                                                                       | -0.01<br>(-0.010, -0.009)               | -0.01<br>(-0.010, -0.009)                | -0.01<br>(-0.010, -0.009)               | -0.01<br>(-0.010, -0.009)               |
| all MIXED CVD profiles                                 | <b>-0.03</b><br><b>(-0.030, -0.029)</b>                                                                                                                       | <b>-0.04</b><br><b>(-0.040, -0.039)</b> | <b>-0.02</b><br><b>(-0.020, -0.019)</b>  | <b>-0.02</b><br><b>(-0.020, -0.019)</b> | <b>-0.03</b><br><b>(-0.030, -0.029)</b> |
| <b>AD-Related and Other Neuropathology covariates:</b> |                                                                                                                                                               |                                         |                                          |                                         |                                         |
| NIA-Reagan Diagnosis of AD                             | <b>-0.07</b><br><b>(-0.015, -0.004)</b>                                                                                                                       | <b>-0.07</b><br><b>(-0.087, -0.059)</b> | <b>-0.03</b><br><b>(-0.047, -0.024)</b>  | <b>-0.03</b><br><b>(-0.042, -0.019)</b> | <b>-0.05</b><br><b>(-0.065, -0.037)</b> |
| Hippocampal Sclerosis                                  | <b>-0.04</b><br><b>(-0.063, -0.015)</b>                                                                                                                       | <b>-0.06</b><br><b>(-0.093, -0.038)</b> | -0.01<br>(-0.033, 0.005)                 | -0.02<br>(-0.038, -0.006)               | -0.01<br>(-0.043, 0.003)                |
| TDP-43                                                 | <b>-0.02</b><br><b>(-0.029, -0.010)</b>                                                                                                                       | <b>-0.01</b><br><b>(-0.025, -0.010)</b> | <b>-0.008</b><br><b>(-0.013, -0.003)</b> | -0.004<br>(-0.009, 0.001)               | <b>-0.01</b><br><b>(-0.016, -0.003)</b> |
| Neocortical Lewy Bodies                                | <b>-0.05</b><br><b>(-0.074, -0.036)</b>                                                                                                                       | <b>-0.07</b><br><b>(-0.098, -0.053)</b> | <b>-0.04</b><br><b>(-0.064, -0.033)</b>  | <b>-0.03</b><br><b>(-0.050, -0.018)</b> | <b>-0.05</b><br><b>(-0.077, -0.040)</b> |

**NOTE:** CVD=Cerebrovascular disease. Linear mixed effect regression model included terms for each of the 21 profiles listed in the table and their interactions with time (years before death), adjusting for age, sex, education, NIA-Reagan AD diagnosis, hippocampal sclerosis, TDP-43, neocortical Lewy bodies and their interactions with time. Bolded entries signify significance based on 95% confidence intervals and a corrected p-value $\leq$ 0.01.

**STROBE statement: Reporting guidelines checklist for cohort, case-control and cross-sectional studies**

| <b>SECTION</b>            | <b>ITEM NUMBER</b> | <b>CHECKLIST ITEM</b>                                                                                                                                                                                                                                                                                                                                                                                                                      | <b>REPORTED ON PAGE NUMBER:</b>                              |
|---------------------------|--------------------|--------------------------------------------------------------------------------------------------------------------------------------------------------------------------------------------------------------------------------------------------------------------------------------------------------------------------------------------------------------------------------------------------------------------------------------------|--------------------------------------------------------------|
| <b>TITLE AND ABSTRACT</b> |                    |                                                                                                                                                                                                                                                                                                                                                                                                                                            |                                                              |
|                           | 1a                 | Indicate the study's design with a commonly used term in the title or the abstract                                                                                                                                                                                                                                                                                                                                                         | Page 1                                                       |
|                           | 1b                 | Provide in the abstract an informative and balanced summary of what was done and what was found                                                                                                                                                                                                                                                                                                                                            | Page 2 to 3                                                  |
| <b>INTRODUCTION</b>       |                    |                                                                                                                                                                                                                                                                                                                                                                                                                                            |                                                              |
| Background and objectives | 2                  | Explain the scientific background and rationale for the investigation being reported                                                                                                                                                                                                                                                                                                                                                       | Page 3 to 4                                                  |
|                           | 3                  | State specific objectives, including any pre-specified hypotheses                                                                                                                                                                                                                                                                                                                                                                          | Page 3 to 4                                                  |
| <b>METHODS</b>            |                    |                                                                                                                                                                                                                                                                                                                                                                                                                                            |                                                              |
| Study design              | 4                  | Present key elements of study design early in the paper                                                                                                                                                                                                                                                                                                                                                                                    | Page 4                                                       |
| Setting                   | 5                  | Describe the setting, locations, and relevant dates, including periods of recruitment, exposure, follow-up, and data collection                                                                                                                                                                                                                                                                                                            | Page 4                                                       |
| Participants              | 6a                 | Cohort study—Give the eligibility criteria, and the sources and methods of selection of participants. Describe methods of follow-up<br>Case-control study—Give the eligibility criteria, and the sources and methods of case ascertainment and control selection. Give the rationale for the choice of cases and controls<br>Cross-sectional study—Give the eligibility criteria, and the sources and methods of selection of participants | Page 4                                                       |
|                           | 6b                 | Cohort study—For matched studies, give matching criteria and number of exposed and unexposed<br>Case-control study—For matched studies, give matching criteria and the number of controls per case<br>Variables                                                                                                                                                                                                                            | n/a not a matched study; case and control details on page 10 |

| <b>SECTION</b>            | <b>ITEM NUMBER</b> | <b>CHECKLIST ITEM</b>                                                                                                                                                                                                                                                         | <b>REPORTED ON PAGE NUMBER:</b> |
|---------------------------|--------------------|-------------------------------------------------------------------------------------------------------------------------------------------------------------------------------------------------------------------------------------------------------------------------------|---------------------------------|
| Variables                 | 7                  | Clearly define all outcomes, exposures, predictors, potential confounders, and effect modifiers. Give diagnostic criteria, if applicable                                                                                                                                      | Page 4 to 8                     |
| Data sources/measurements | 8*                 | For each variable of interest, give sources of data and details of methods of assessment (measurement). Describe comparability of assessment methods if there is more than one group.                                                                                         | Page 4 to 8                     |
| Bias                      | 9                  | Describe any efforts to address potential sources of bias.                                                                                                                                                                                                                    | Page 8                          |
| Study size                | 10                 | Explain how the study size was arrived at                                                                                                                                                                                                                                     | Pages 5 to 6 and page 10        |
| Quantitative variables    | 11                 | Explain how quantitative variables were handled in the analyses. If applicable, describe which groupings were chosen and why .                                                                                                                                                | Page 6 to 9                     |
| Statistical methods       | 12a                | Describe all statistical methods, including those used to control for confounding                                                                                                                                                                                             | Page 9                          |
|                           | 12b                | Describe any methods used to examine subgroups and interactions                                                                                                                                                                                                               | Page 9                          |
|                           | 12c                | Explain how missing data were addressed                                                                                                                                                                                                                                       | Page 5 to 6                     |
|                           | 12d                | Cohort study—If applicable, explain how loss to follow-up was addressed<br>Case-control study—If applicable, explain how matching of cases and controls was addressed<br>Cross-sectional study—If applicable, describe analytical methods taking account of sampling strategy | n/a cohort study                |
|                           | 12e                | Describe any sensitivity analyses                                                                                                                                                                                                                                             | n/a                             |
| <b>RESULTS</b>            |                    |                                                                                                                                                                                                                                                                               |                                 |
| Participants              | 13a                | Report numbers of individuals at each stage of study—eg numbers potentially eligible, examined for eligibility, confirmed eligible, included in the study, completing follow-up, and analysed                                                                                 | Page 5 to 6, page 10 to 12      |
|                           | 13b                | Give reasons for non-participation at each stage                                                                                                                                                                                                                              | Page 5 to 6                     |

| <b>SECTION</b>   | <b>ITEM NUMBER</b> | <b>CHECKLIST ITEM</b>                                                                                                                                                                                                                                     | <b>REPORTED ON PAGE NUMBER:</b> |
|------------------|--------------------|-----------------------------------------------------------------------------------------------------------------------------------------------------------------------------------------------------------------------------------------------------------|---------------------------------|
|                  | 13c                | Consider use of a flow diagram                                                                                                                                                                                                                            | n/a                             |
| Descriptive Data | 14a                | Give characteristics of study participants (eg demographic, clinical, social) and information on exposures and potential confounders                                                                                                                      | page 10 to 12                   |
|                  | 14b                | Indicate number of participants with missing data for each variable of interest                                                                                                                                                                           | Page 5 to 6                     |
|                  | 14c                | Cohort study—Summarise follow-up time (eg, average and total amount)                                                                                                                                                                                      | Page 5                          |
| Outcome Data     | 15*                | Cohort study—Report numbers of outcome events or summary measures over time<br>Case-control study—Report numbers in each exposure category, or summary measures of exposure<br>Cross-sectional study—Report numbers of outcome events or summary measures | Page 23 and Supplemental table  |
| Main Results     | 16a                | Give unadjusted estimates and, if applicable, confounder-adjusted estimates and their precision (e.g. 95% confidence interval). Make clear which confounders were adjusted for and why they were included                                                 | Page 24 to 26, page 29          |
|                  | 16b                | Report category boundaries when continuous variables were categorized                                                                                                                                                                                     | n/a                             |
|                  | 16c                | If relevant, consider translating estimates of relative risk into absolute risk for a meaningful time period                                                                                                                                              | n/a                             |
|                  | 16d                | Report results of any adjustments for multiple comparisons                                                                                                                                                                                                | Page 9 to 13, page 24 to 26     |
| Other Analyses   | 17a                | Report other analyses done—e.g. analyses of subgroups and interactions, and sensitivity analyses                                                                                                                                                          | n/a                             |
|                  | 17b                | If numerous genetic exposures (genetic variants) were examined, summarize results from all analyses undertaken                                                                                                                                            | n/a                             |
|                  | 17c                | If detailed results are available elsewhere, state how they can be accessed                                                                                                                                                                               | n/a                             |

| <b>SECTION</b>    | <b>ITEM NUMBER</b> | <b>CHECKLIST ITEM</b>                                                                                                                                                      | <b>REPORTED ON PAGE NUMBER:</b> |
|-------------------|--------------------|----------------------------------------------------------------------------------------------------------------------------------------------------------------------------|---------------------------------|
| <b>DISCUSSION</b> |                    |                                                                                                                                                                            |                                 |
| Key Results       | 18                 | Summarise key results with reference to study objectives                                                                                                                   | Page 14                         |
| Limitations       | 19                 | Discuss limitations of the study, taking into account sources of potential bias or imprecision. Discuss both direction and magnitude of any potential bias                 | Page 17                         |
| Interpretation    | 20                 | Give a cautious overall interpretation of results considering objectives, limitations, multiplicity of analyses, results from similar studies, and other relevant evidence | Page 14 to 18                   |
| Generalisability  | 21                 | Discuss the generalisability (external validity) of the study results<br>Other information                                                                                 | Page 15                         |
| <b>FUNDING</b>    |                    |                                                                                                                                                                            |                                 |
|                   | 22                 | Give the source of funding and the role of the funders for the present study and, if applicable, for the original study on which the present article is based              | Page 19                         |
|                   |                    |                                                                                                                                                                            |                                 |

\*Give information separately for cases and controls in case-control studies and, if applicable, for exposed and unexposed groups in cohort and cross-sectional studies.
